# Supplementary material for: Ambient temperature affects multiple drivers of physiology and behaviour: adaptation for timely departure of obligate spring migrants
Source: Oxford University Press journal article supplement (doi:10.1242/jeb.236109), 2020-01-01
Supplement: jeb236109supp.pdf [file jeb236109supp.pdf]

**Table S1.** Details of primers used in Real-time PCR

| <b>Gene</b>    | <b>Primer sequence</b>                                             | <b>Accession number</b> |
|----------------|--------------------------------------------------------------------|-------------------------|
| <i>trpv4</i>   | F: 5' CTTCAACAGACCCATCCTCTTC 3'<br>R: 5' TGTCAGGCGCTTCTTGTG 3'     | MF979804                |
| <i>trpm8</i>   | F: 5' TCAGACCTGTGGAATGTTATGG 3'<br>R: 5' CAGCAAAGAGGAAGAGGAAGAA 3' | MG461953                |
| <i>ddc</i>     | F: 5' TGCGGGAAGTGCTTTCAT 3'<br>R: 5' CTAGGAGCCATTTGTGAGGATT 3'     | MT394487                |
| <i>th</i>      | F: 5' GATCGTTGAGCTGGAATACTT 3'<br>R: 5' CACATCTTCTGCTACCCCTCTTG 3' | KM272254                |
| <i>adcyap1</i> | F: 5' ACATAGACGGCATCTTCACG 3'<br>R: 5' CAGGACGGCTGCTAAGTATTTTC 3'  | MF427847                |
| <i>vps13a</i>  | F: 5' GTGAATGGCAGTACACTTACGA 3'<br>R: 5' TGGCATGGAAGACAGACTTAAC 3' | MT394488                |
| <i>srd5a3</i>  | F: 5' GCGTCTCTTGCCCTCATTAT 3'<br>R: 5' ATCACTACACACCACCATGTC 3'    | MT394489                |
| <i>ar</i>      | F: 5' ACCCCATAGCAAACACCATC 3'<br>R: 5' TGGTCTACGTGGTCAAATGG 3'     | KU175234                |
| <i>myod1</i>   | F: 5' CATGCCATCGGAGCAGTT 3'<br>R: 5' GAGCAGGAGGACGCTTATTAC 3'      | MF994521                |
| <i>mstn</i>    | F: 5' CACCGGTATTTGGCAGAGTAT 3'<br>R: 5' GATTCCGTCCGTTCTCATCAA 3'   | MT394490                |
| <i>pvalb</i>   | F: 5' GAGATAAGGACGGTGATGGTAAA 3'<br>R: 5' GTTGGAAATTGGGCAGTGAAG 3' | MK986667                |
| <i>mtor</i>    | F: 5' GAGTCCTTACTCTGTGGTTTGAC 3'<br>R: 5' CCTGCAGCCAAGTGTCTATT 3'  | MT415821                |
| <i>hif1a</i>   | F: 5' TGCTGATCCTGCACTCAATAG 3'<br>R: 5' AAGGGCTGGTTGGTTGTT 3'      | MF994522                |

Figure S1

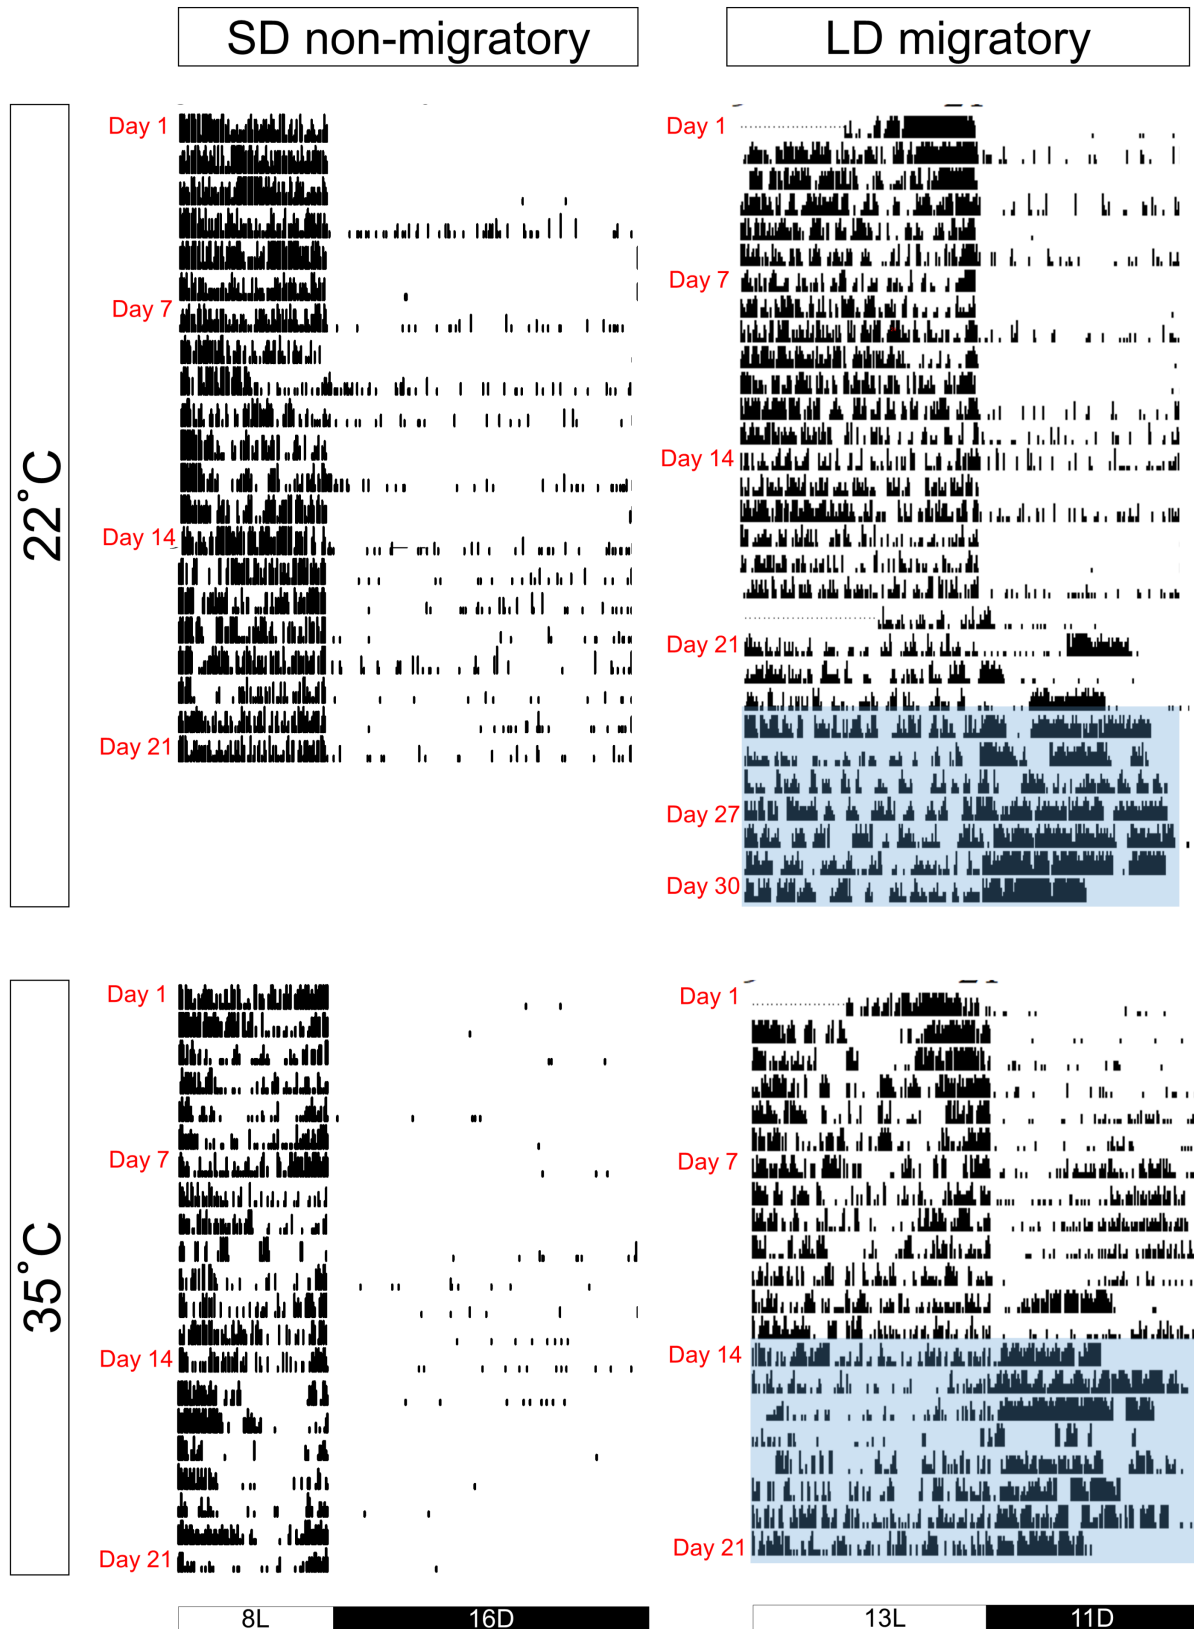

**Figure S1.** Representative 24-h activity record (actogram) of blackheaded buntings (*Emberiza melanocephala*) during photoperiod-induced non-migratory (under short days, SD) and migratory (under long days, LD) life history stages at 22 °C and 35 °C temperatures.

# Figure S2

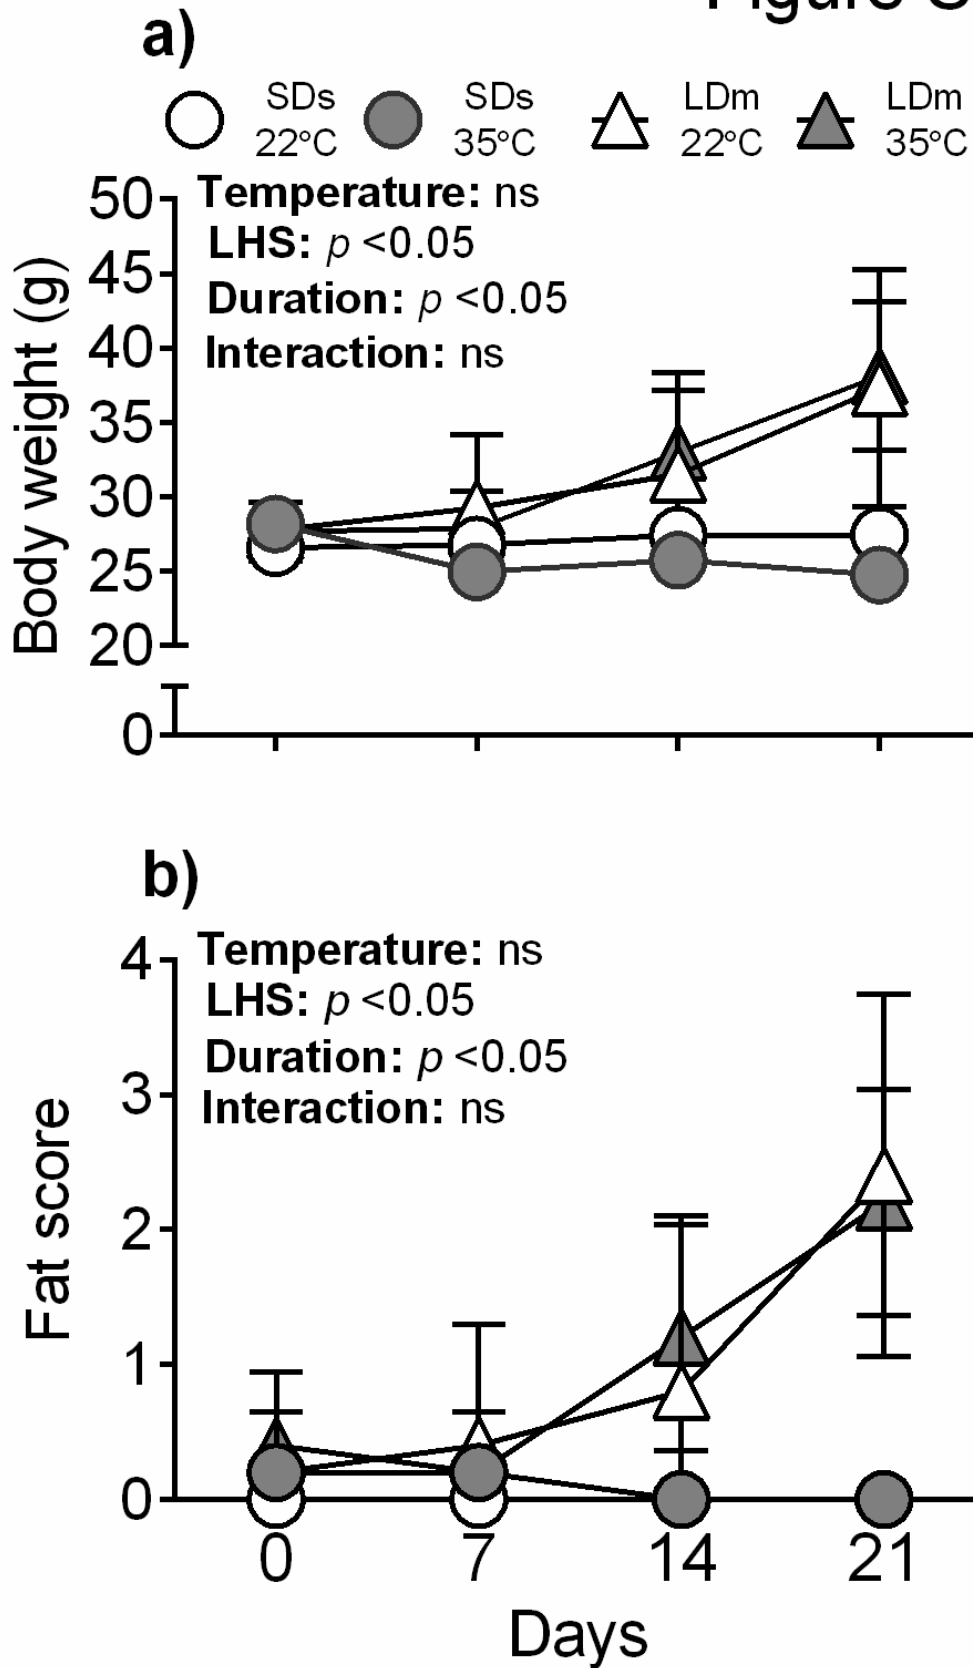

**Figure S2.** Mean ( $\pm$  s.e.m.;  $n = 5$ ) weekly changes in body weight (a) and fat score (b) of blackheaded buntings (*Emberiza melanocephala*;  $n = 5$ ) during photoperiod-induced non-migratory (under short days, SD) and migratory (under long days, LD) life history stages at 22 °C and 35 °C temperatures.
